# Supplementary material for: Brown Seaweed Fucoidan Inhibits Cancer Progression by Dual Regulation of mir-29c/ADAM12 and miR-17-5p/PTEN Axes in Human Breast Cancer Cells
Source: PubMed Central journal article supplement — J Cancer. 2016 Dec 9;7(15):2408–19. doi: 10.7150/jca.15703 (PMC5166552; doi:10.7150/jca.15703), 2016-12-09

**Supplementary Fig. S1.** PTEN expression was high in MCF10A and was not inhibited by fucoidan treatment. However, p-Akt expression was not detected in MCF10A.

**Supplementary figure 1**

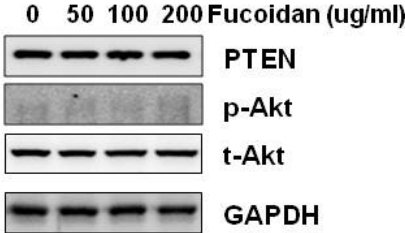

Supplement: jcav07p2408s1.pdf [file jcav07p2408s1.pdf]
